# Supplementary material for: Dramatic selectivity differences in the association of DNA and RNA models with new ethylene- and propylene diamine derivatives and their copper complexes
Source: Royal Society of Chemistry journal article supplement (doi:10.1039/b517386h), 2006-01-01

**Fig S1** Correlation between affinity assay ( $-\lg C_{50}$ ) and melting points from “bulky” amines (data from *Tetrahedron Lett.*, 2002, **43**, 4403–4405; ref. 13) with CT-DNA ( $\blacktriangle$ ). Slope  $a = 0.095 \pm 11\%$ ; abscissa  $y_0 = 3.12 \pm 8\%$ , linear correlation coefficient  $r = 0.9436$ .

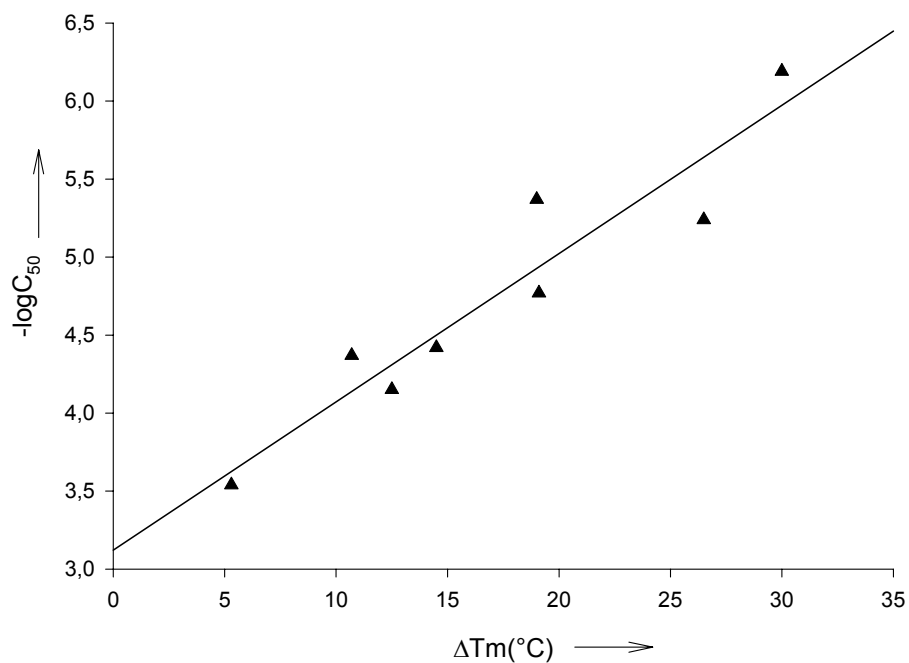

Supplement: b517386h.pdf [file b517386h.pdf]
